# Supplementary material for: Architectural control of metabolic plasticity in epithelial cancer cells
Source: PubMed Central journal article supplement (PMC7979883; doi:10.1038/s42003-021-01899-4), 2021-03-19
Supplement: 42003_2021_1899_MOESM2_ESM.pdf [file 42003_2021_1899_MOESM2_ESM.pdf]

## Supplementary Figures

### Architectural Control of Metabolic Plasticity in Epithelial Cancer Cells

Maia Al Masri<sup>1,2</sup>, Karina Paliotti<sup>1</sup>, Raymond Tran<sup>3</sup>, Ruba Halaoui<sup>1,2</sup>, Virginie Lelarge<sup>1</sup>, Sudipa Chatterjee<sup>1,2</sup>, Li-Ting Wang<sup>1,2</sup>, Christopher Moraes<sup>1,3</sup>, Luke McCaffrey<sup>1,2,4,5</sup>

<sup>1</sup>Rosalind and Morris Goodman Cancer Research Centre, McGill University, Montreal, Canada

<sup>2</sup>Division of Experimental Medicine, McGill University, Montreal, Canada

<sup>3</sup>Department of Chemical Engineering, McGill University, Montreal, Canada

<sup>4</sup>Gerald Bronfman Department of Oncology, McGill University, Montreal, Canada

<sup>5</sup>Correspondence: [luke.mccaffrey@mcgill.ca](mailto:luke.mccaffrey@mcgill.ca)

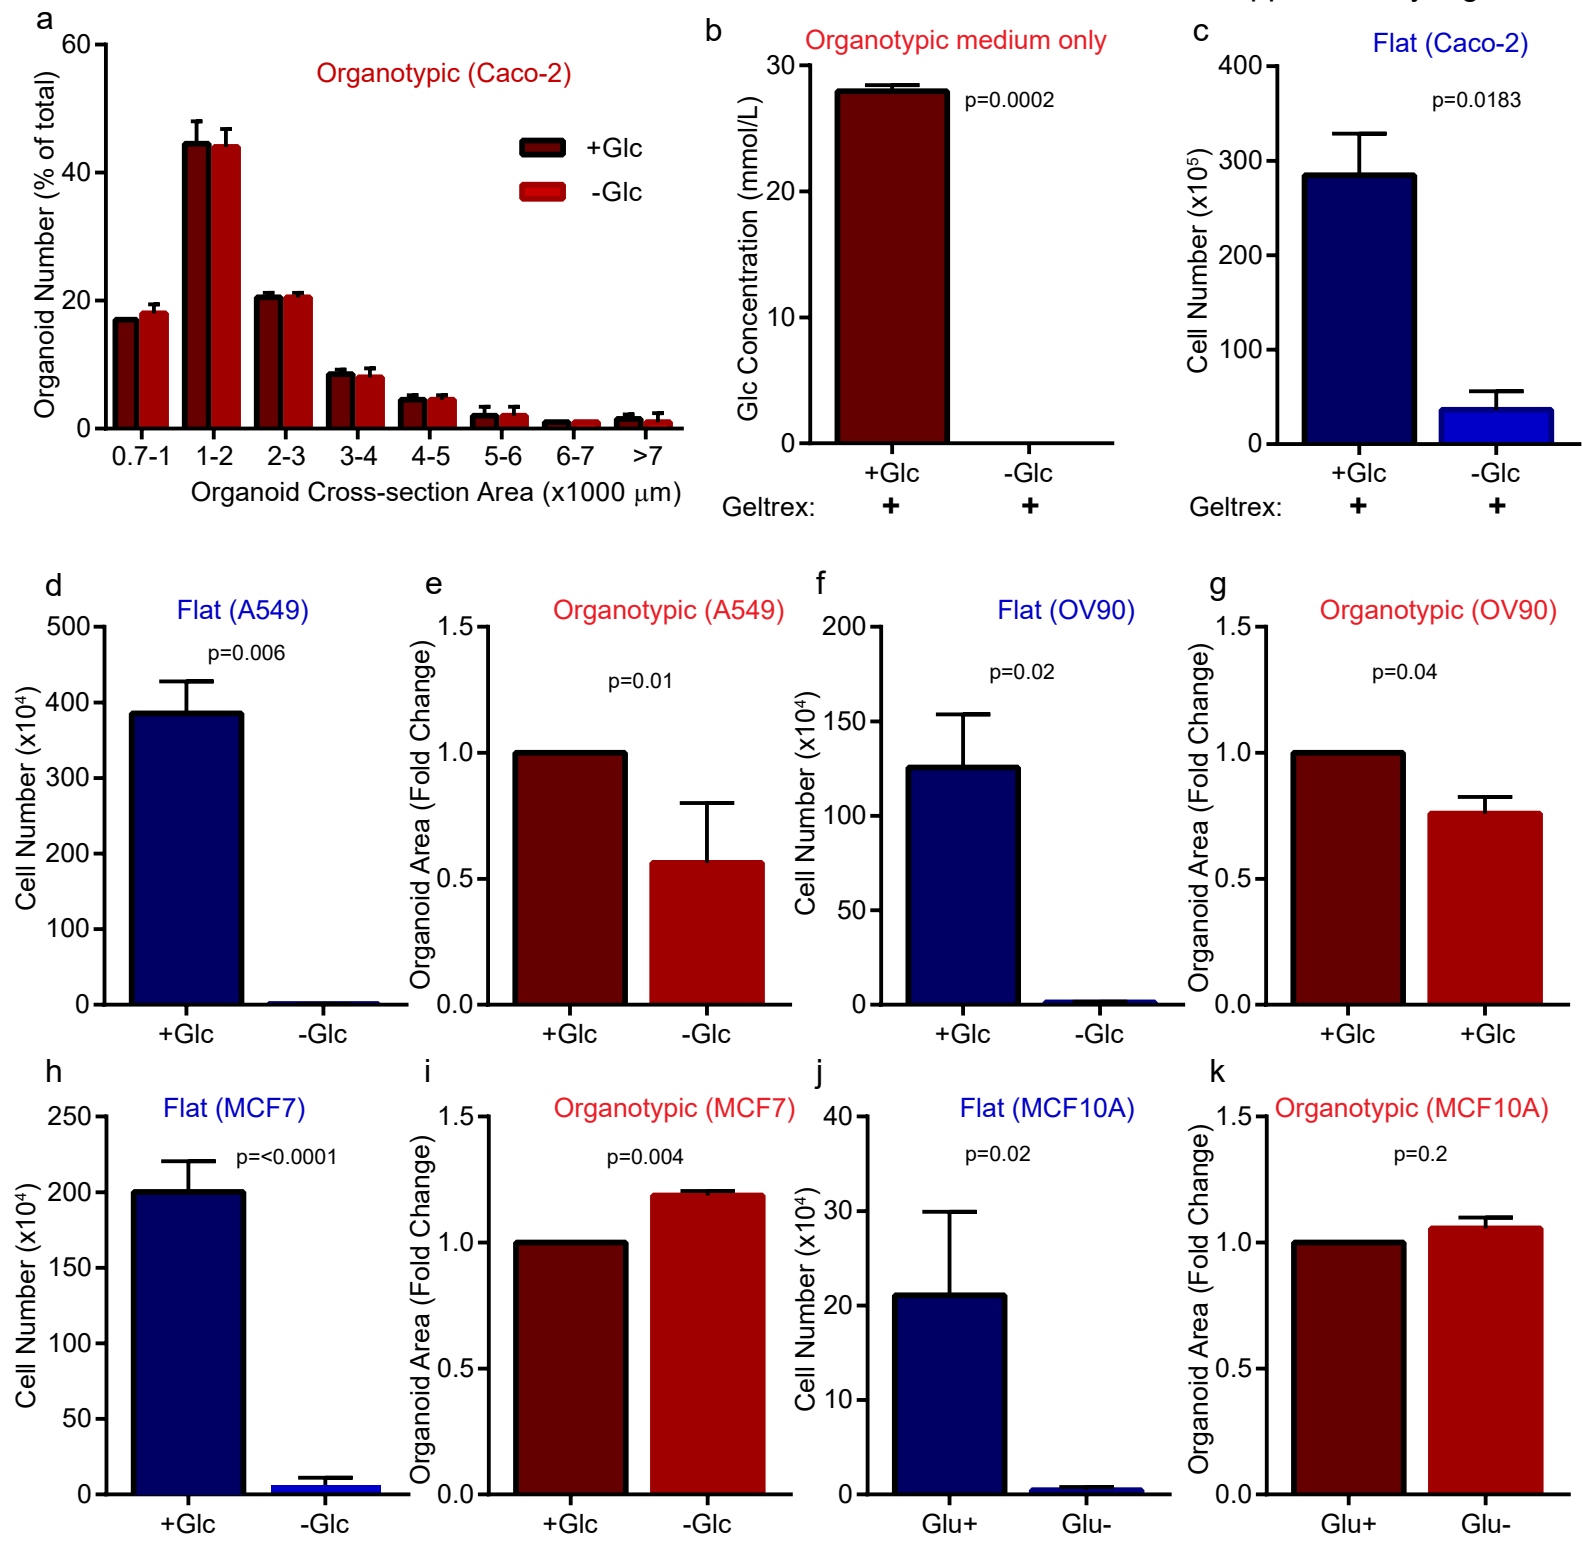

**Supplementary Figure S1 - Epithelial architecture is associated with glucose-dependent growth**

**a)** Histogram showing the distribution of Caco-2 organoid cross-section areas after 6-days of organotypic culture in the presence (+Glc) or absence (-Glc) of glucose (n=2677 (+Glc), n=2663 (-Glc)) (r=2 independent experimental replicates).

**b)** Bar chart showing the glucose concentration cell-free culture media containing Geltrex in the presence (+Glc) or absence (-Glc) of glucose (r=2 independent experimental replicates).

**c)** Bar chart showing Caco-2 cell number after 6 days of flat culture in media containing soluble basement membrane extract (BME) in the presence (+Glc) or absence (-Glc) of glucose (r=2 independent experimental replicates).

**d)** Bar chart showing A549 cell number after 6 days of flat culture in the presence (+Glc) or absence (-Glc) of glucose (r=2 independent experimental replicates).

**e)** Bar chart showing cross-section area of A549 clusters after 6 days of organotypic culture in the presence (+Glc) or absence (-Glc) of glucose (n=3048 (+Glc), n=3435(-Glc)) (r=4 independent experimental replicates).

**f)** Bar chart showing OV90 after 6 -days of flat culture in the presence (+Glc) or absence (-Glc) of glucose (r=2 independent experimental replicates).

**g)** Bar chart showing cross-section area of OV90 clusters after 6 days of organotypic culture in the presence (+Glc) or absence (-Glc) of glucose (n=859 (+Glc), n=592 (-Glc)) (r=2 independent experimental replicates).

**h)** Bar chart showing MCF7 cell number after 6 days of flat culture in the presence (+Glc) or absence (-Glc) of glucose (r=3 independent experimental replicates).

**i)** Bar chart showing cross-section area of MCF7 clusters after 6 days of organotypic culture in the presence (+Glc) or absence (-Glc) of glucose (n=680 (+Glc), n=944 (-Glc)) (r=2 independent experimental replicates).

**j)** Bar chart showing MCF10A cell number after 6 days of flat culture in the presence (+Glc) or absence (-Glc) of glucose (r=3 independent experimental replicates).

**k)** Bar chart showing cross-section area of MCF10A spheroids after 6 days of organotypic culture in the presence (+Glc) or absence (-Glc) of glucose (n=313 spheroids (+Glc), n=294 spheroids (-Glc)), (r=2 independent experimental replicates).

All error bars are standard deviation.

a

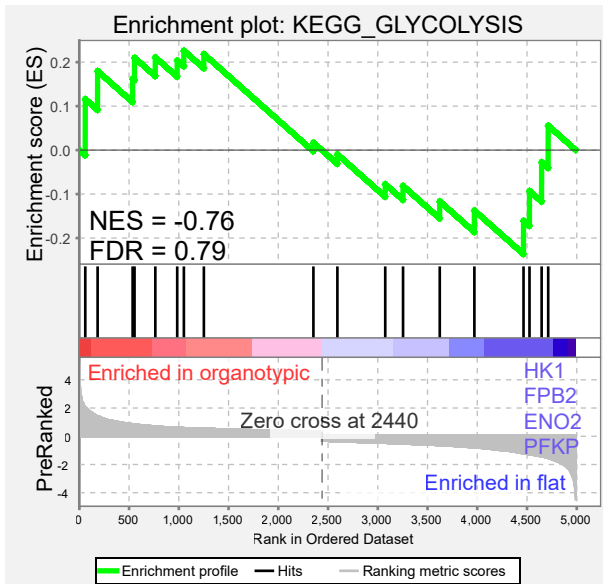

b

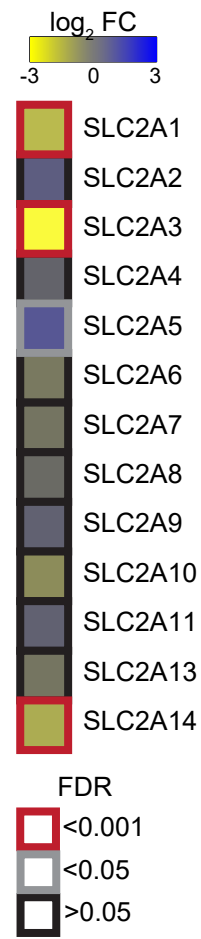

**Supplementary Figure S2 – Enrichment of genes related to glycolysis**

**a)** Gene Set Enrichment plot for KEGG\_GLYCOLYSIS\_GLUconeogenesis gene set. Four genes in blue represent genes enriched (false discovery rate (FDR) < 0.01) in flat cultures.

**b)** Heatmap of gene expression for glucose transporters from RNA-Seq showing log<sub>2</sub> fold change (FC) of organotypic compared to flat cultures. Outlines indicate the FDR for each gene. (Supplementary Table S1).

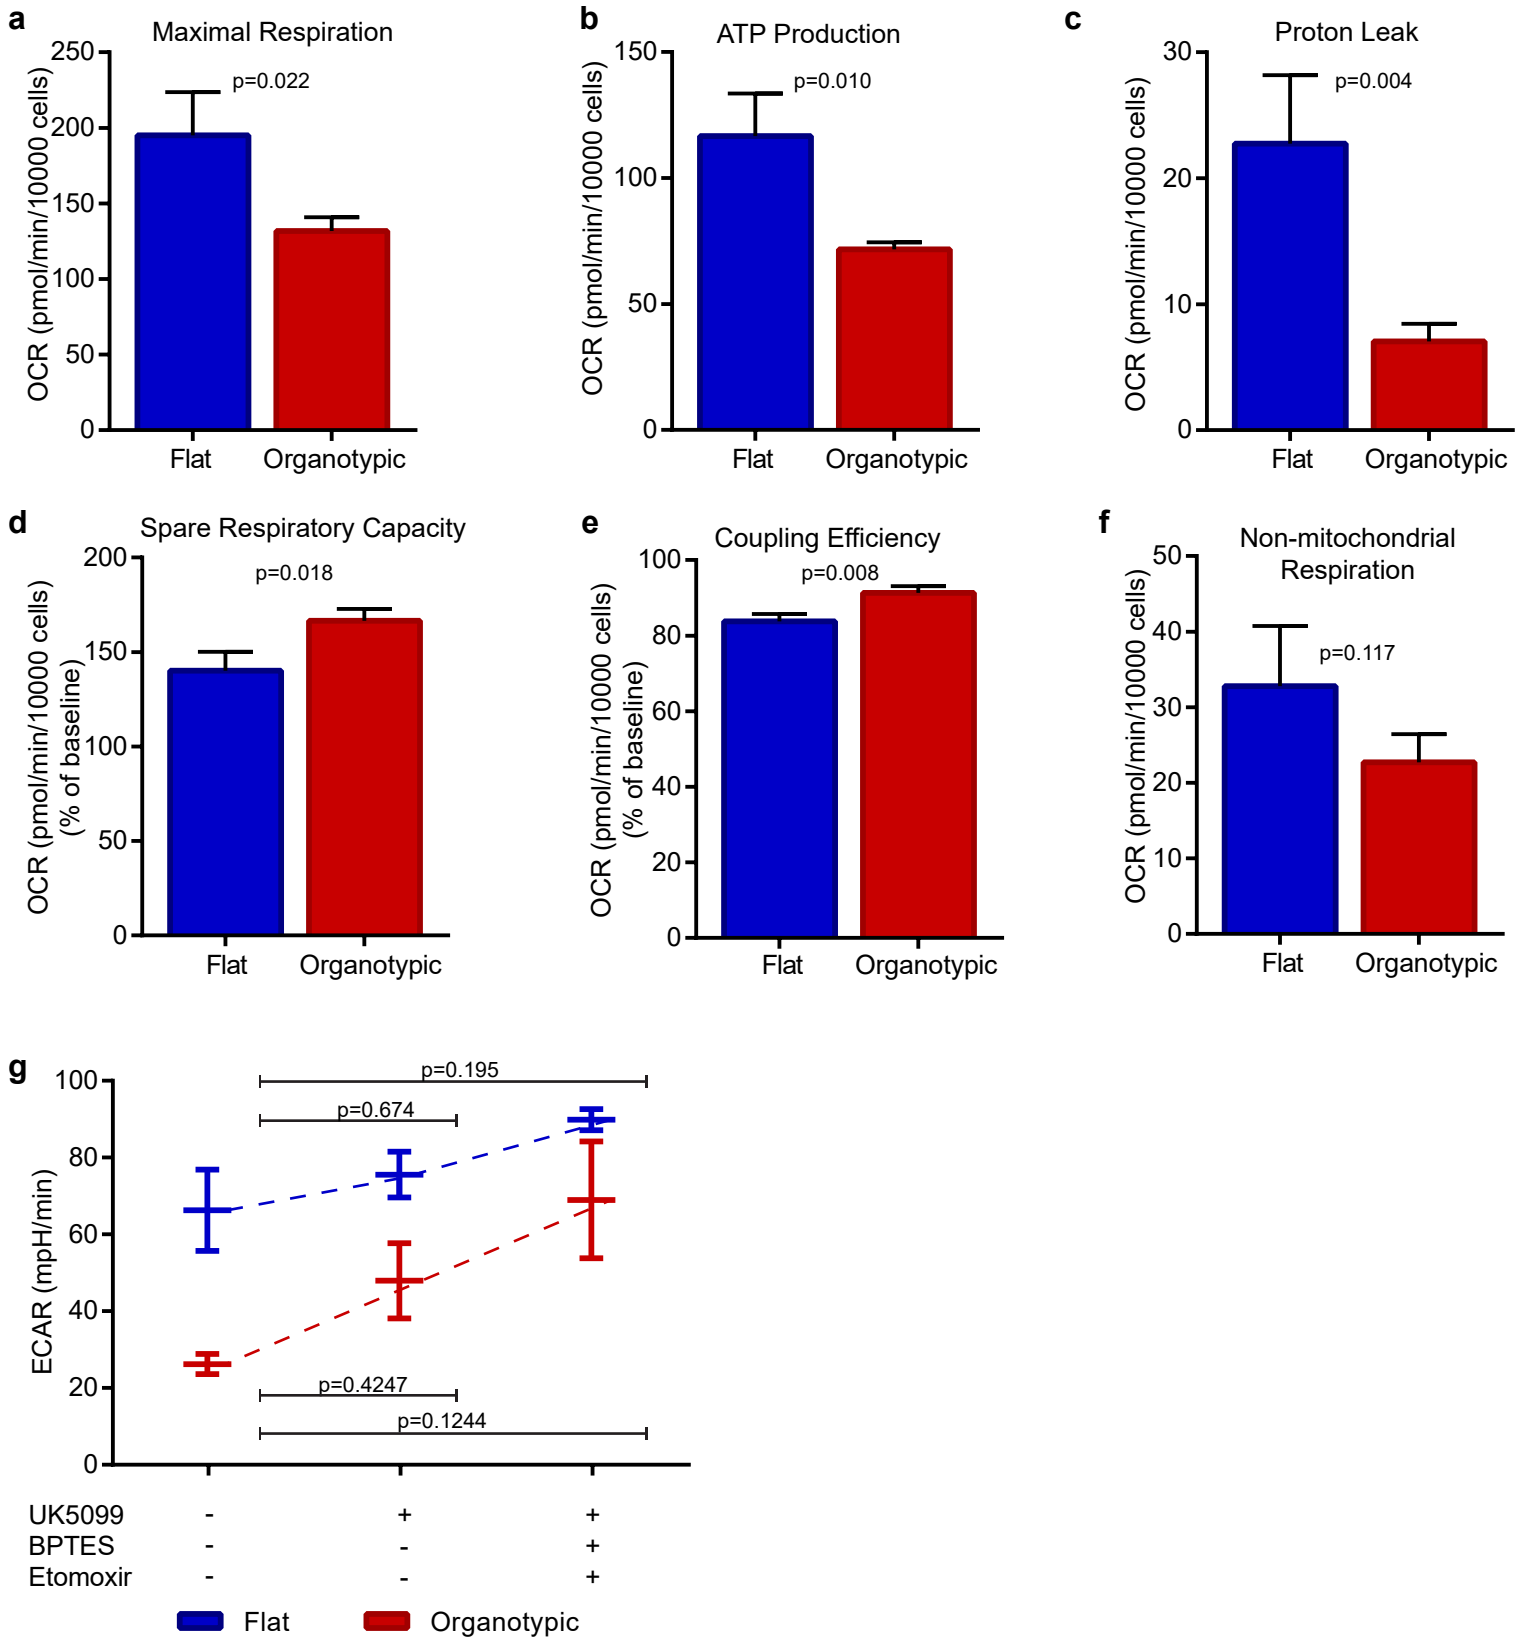

**Supplementary Figure S3 – Epithelial architecture is associated with energetic stress responses**

**a-f)** Bar charts showing maximal respiration **(a)**, ATP production **(b)**, proton leak **(c)**, spare respiratory capacity **(d)**, mitochondrial coupling efficiency **(e)**, and non-mitochondrial respiration **(f)** for flat and organotypic Caco-2 cultures (n=3 independent experimental replicates).

**g)** Waterfall chart showing ECARs at baseline and following sequential addition of UK5099 followed by BPTES and Etomoxir for flat and organotypic Caco-2 cultures (n=2 independent experimental replicates).

All error bars are standard deviation.



**a**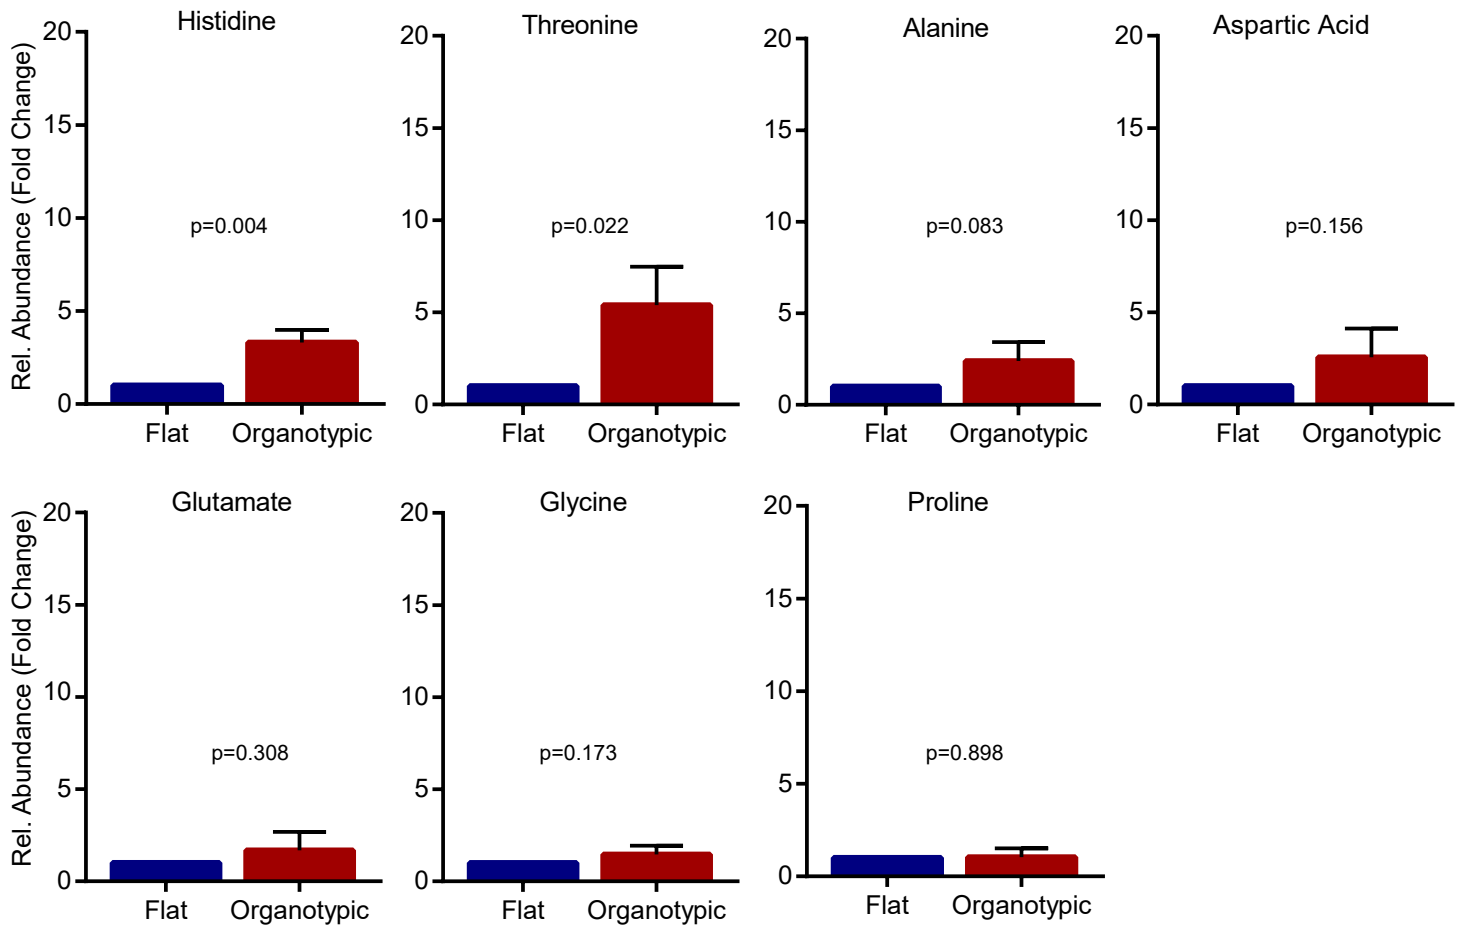**b**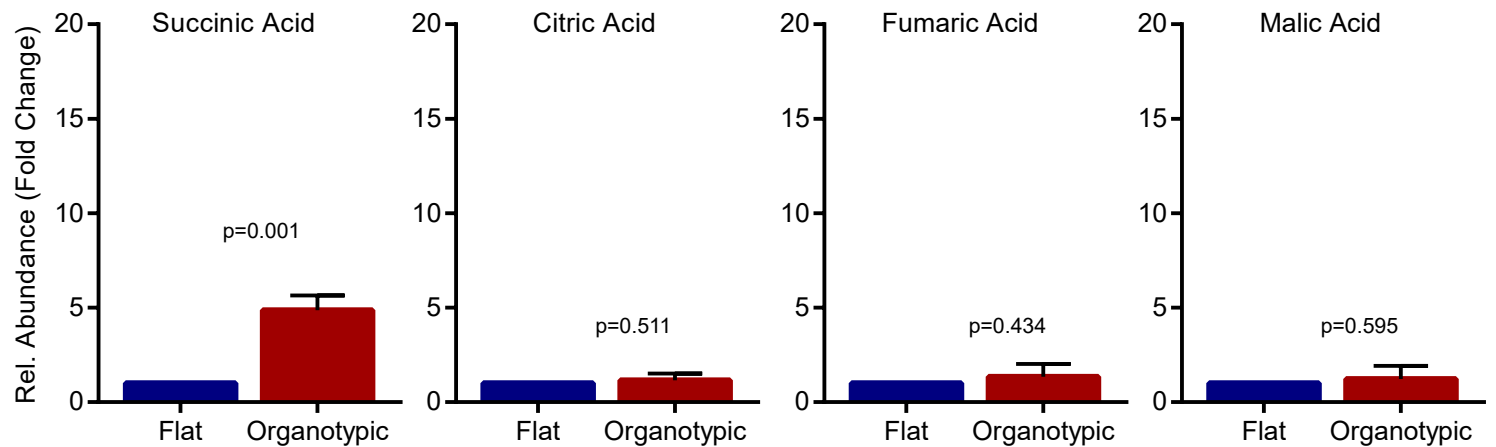

**Supplementary Figure S4 – Amino acid metabolism is enriched in organotypic cultures**

**a)** Bar graphs showing abundance of histidine, threonine, alanine, aspartic acid, glutamic acid, glycine, and proline from flat and organotypic Caco-2 cells. Cells were cultured for 5 days, then cellular extracts were analyzed by GC/MS. Data available in Supplementary Table S2. (n=5 sample replicates for each of r=3 independent experimental replicates).

**b)** Bar graphs showing normalized levels of succinic acid, citric acid, fumaric acid, and malic acid from flat and organotypic Caco-2 cells. (n=5 sample replicates for each of r=3 independent experimental replicates).

All error bars are standard deviation.



**Supplementary Figure S5 – Differences in metabolic networks in flat and organotypic cultures**

Metabolic map showing integrated gene-expression and GC/MS data for metabolic pathways enriched in organotypic Caco-2 cultures. Red indicates enrichment in organotypic cultures and blue indicates enrichment in flat cultures. Grey indicates no enrichment and black indicates the gene/metabolite was not measured.

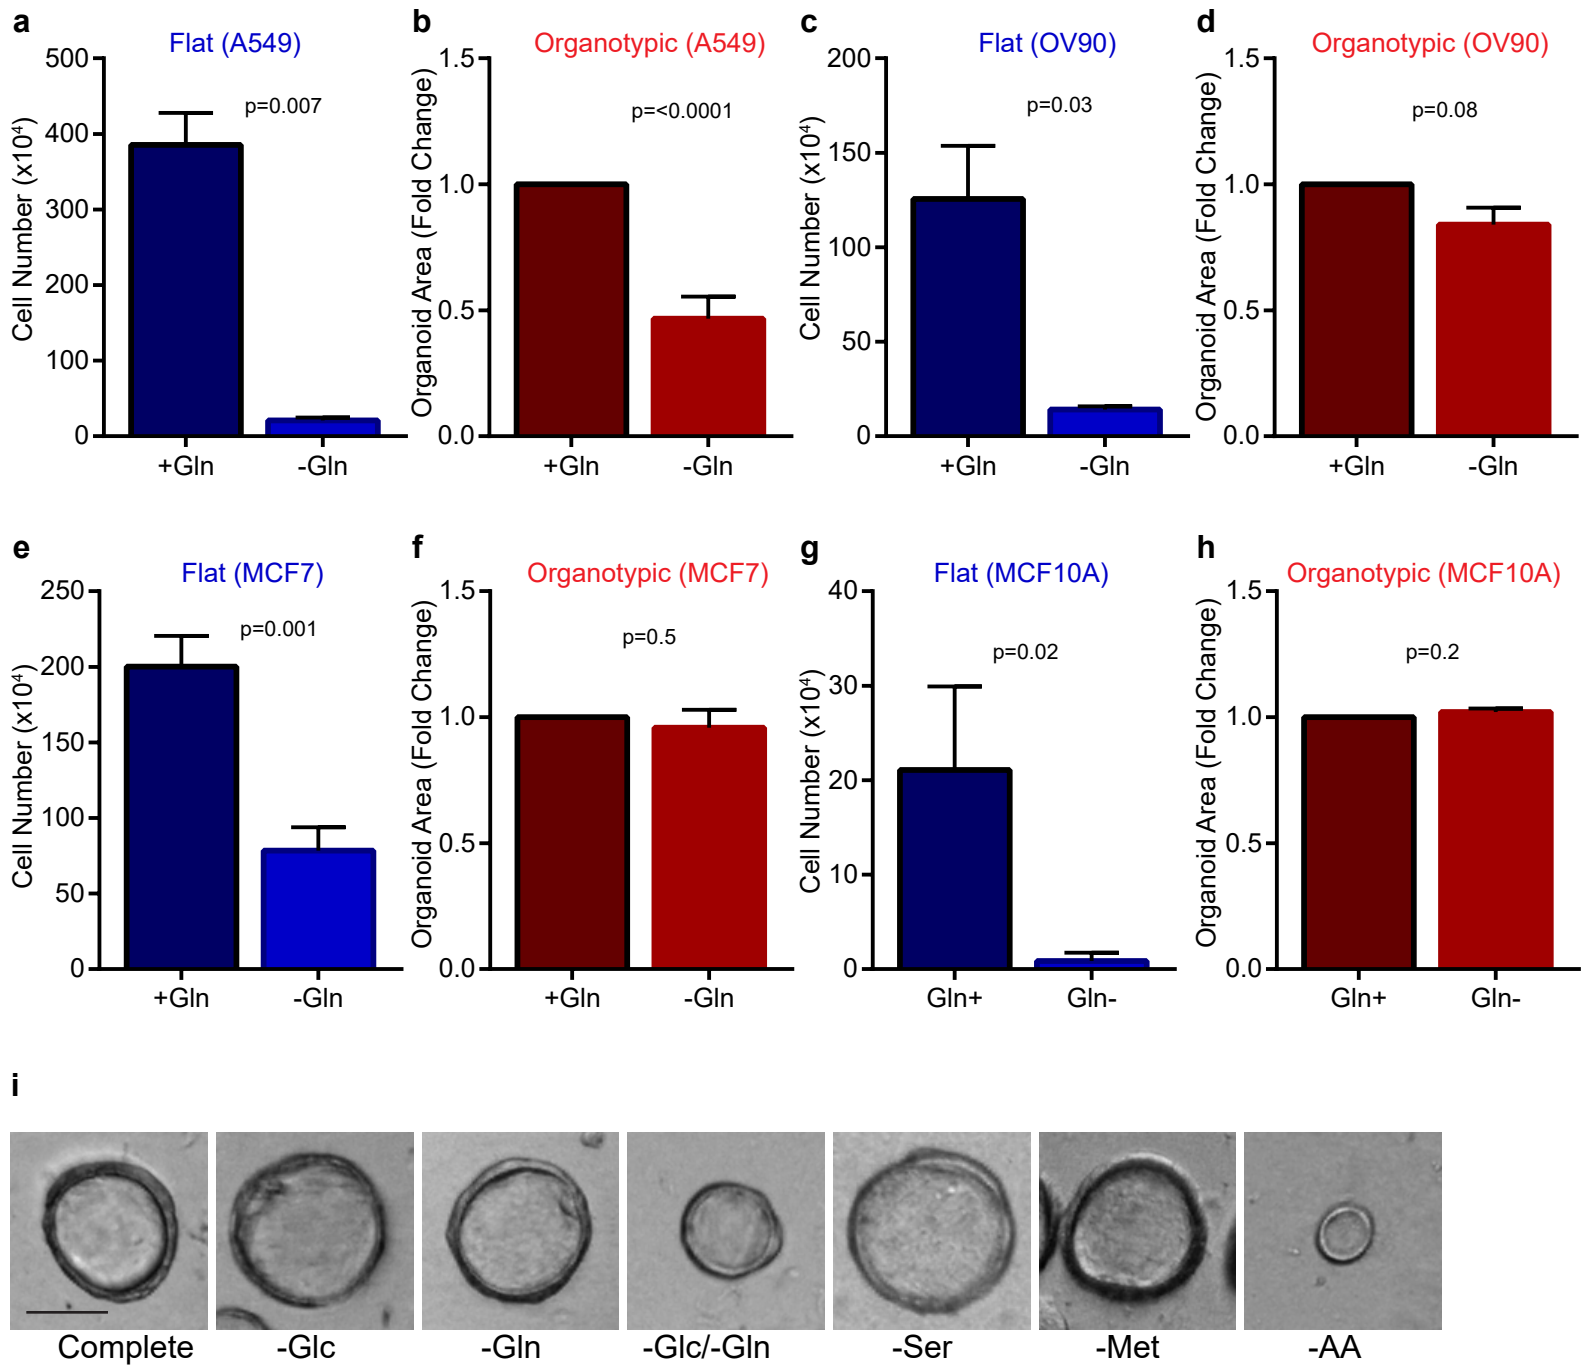

**Supplementary Figure S6 - Organotypic cells exhibit plasticity to Amino Acid nutrient stress**

**a)** Bar chart showing A549 cell number after 6 days of flat culture in the presence (+Gln) or absence (-Gln) of glutamine (n=2 independent experimental replicates).

**b)** Bar chart showing cross-section area of A549 cell clusters after 6 days of organotypic culture in the presence (+Gln) or absence (-Gln) of glutamine (n=3048(+Gln), n=2872(-Gln)) (r=4 independent experimental replicates).

**c)** Bar chart showing OV90 cell number after 6 days of flat culture in the presence (+Gln) or absence (-Gln) of glutamine (n=2 independent experimental replicates).

**d)** Bar chart showing cross-section area of OV90 cell clusters after 6 days of organotypic culture in the presence (+Gln) or absence (-Gln) of glutamine (n=859(+Gln), n=821(-Gln)) (r=2 independent experimental replicates).

**e)** Bar chart showing MCF7 cell number after 6 days of flat culture in the presence (+Gln) or absence (-Gln) of glutamine (n=2 independent experimental replicates).

**f)** Bar chart showing cross-section area of MCF7 cell clusters after 6 days of organotypic culture in the presence (+Gln) or absence (-Gln) of glutamine (n=680(+Gln), n=829(-Gln)) (r=2 independent experimental replicates).

**e)** Bar chart showing MCF10A cell number after 6 days of flat culture in the presence (+Gln) or absence (-Gln) of glutamine (n=2 independent experimental replicates).

**f)** Bar chart showing cross-section area of MCF10A cell clusters after 6 days of organotypic culture in the presence (+Gln) or absence (-Gln) of glutamine (n=359 (+Gln), n=316 (-Gln)); (r=2 independent experimental replicates).

**i)** Representative phase contrast images from Caco-2 organotypic cultures showing architecture of cell cysts grown in complete medium, or medium free of glucose (-Glc), glutamine (-Gln), glucose and glutamine (-Glc/Gln), serine (-Ser), methionine (-Met), and amino acids (-AA).

All error bars are standard deviation.

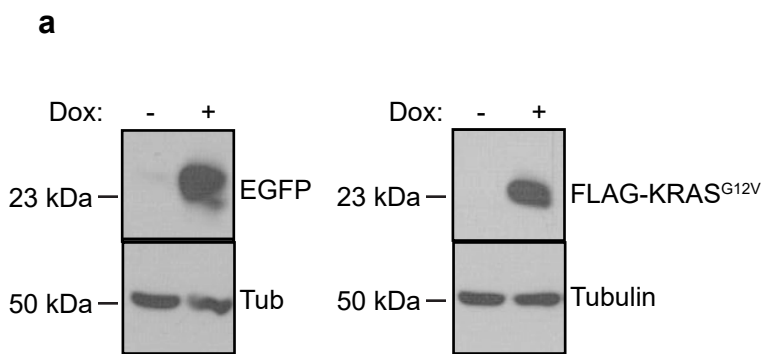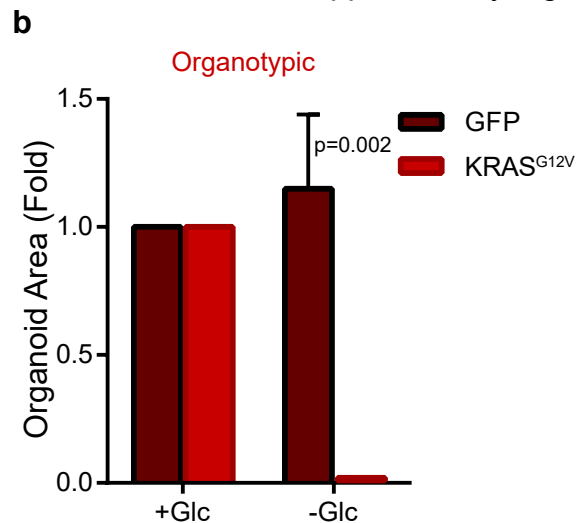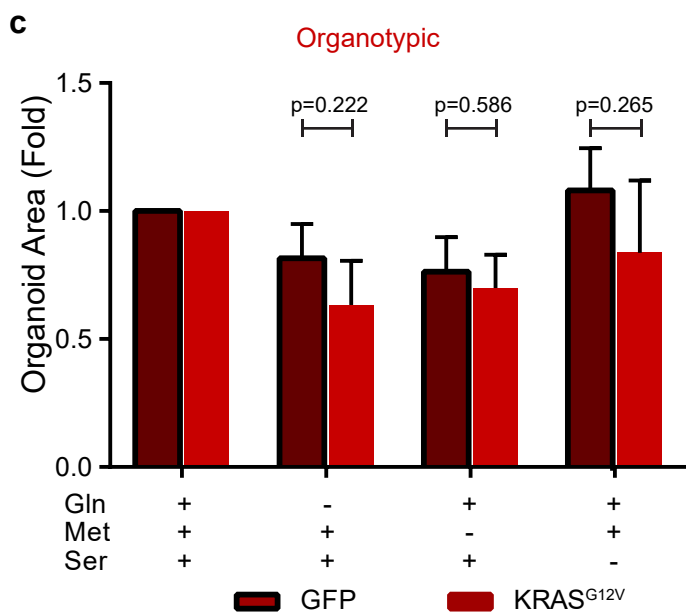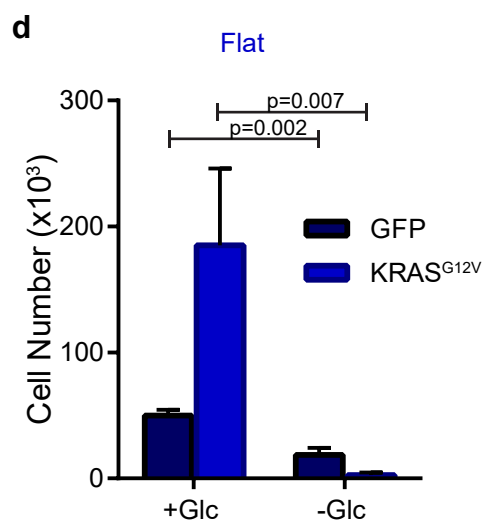

**Supplementary Figure S7 – Organotypic cultures have reduced metabolic plasticity with Ras-driven glucose addiction**

**a)** Immunoblot showing doxycycline-inducible (+/- Dox) expression of GFP and FLAG-tagged KRAS<sup>G12V</sup> in Caco-2 cells using anti-GFP and anti-FLAG antibodies, respectively. Tubulin (Tub) was included as a loading control. Molecular weights (kDa) are indicated on the left.

**b)** Bar chart showing cross-section area of control (GFP) and KRAS<sup>G12V</sup>-expressing organotypic Caco-2 cells in the presence (+Glc) or absence (-Glc) of glucose (GFP: n=888 (+Glc), n= 898 (-Glu); KRAS<sup>G12V</sup>: n=975 (+Glc) n=0 (-Glc)); (r=3 independent experimental replicates).

**c)** Bar chart showing cross-section area of control (GFP) and KRAS<sup>G12V</sup>-expressing organotypic cells in the presence (+) or absence (-) of glutamine (Gln), methionine (Met), or serine (Ser) (GFP: n=888 (+Gln, +Met, +Ser), n= 916 (-Gln), n= 585 (-Met), n=759 (-Ser); KRAS<sup>G12V</sup>: n=975 (+Gln, +Met, +Ser) n=1106 (-Gln), n=1103 (-Met), n=999 (-Ser)); (r=3 independent experimental replicates).

**d)** Bar chart showing cell number for GFP and KRAS<sup>G12V</sup>-expressing Caco-2 flat cells in the presence (+Glc) or absence (-Glc) of glucose; (r=3 independent experimental replicates).

All error bars are standard deviation.



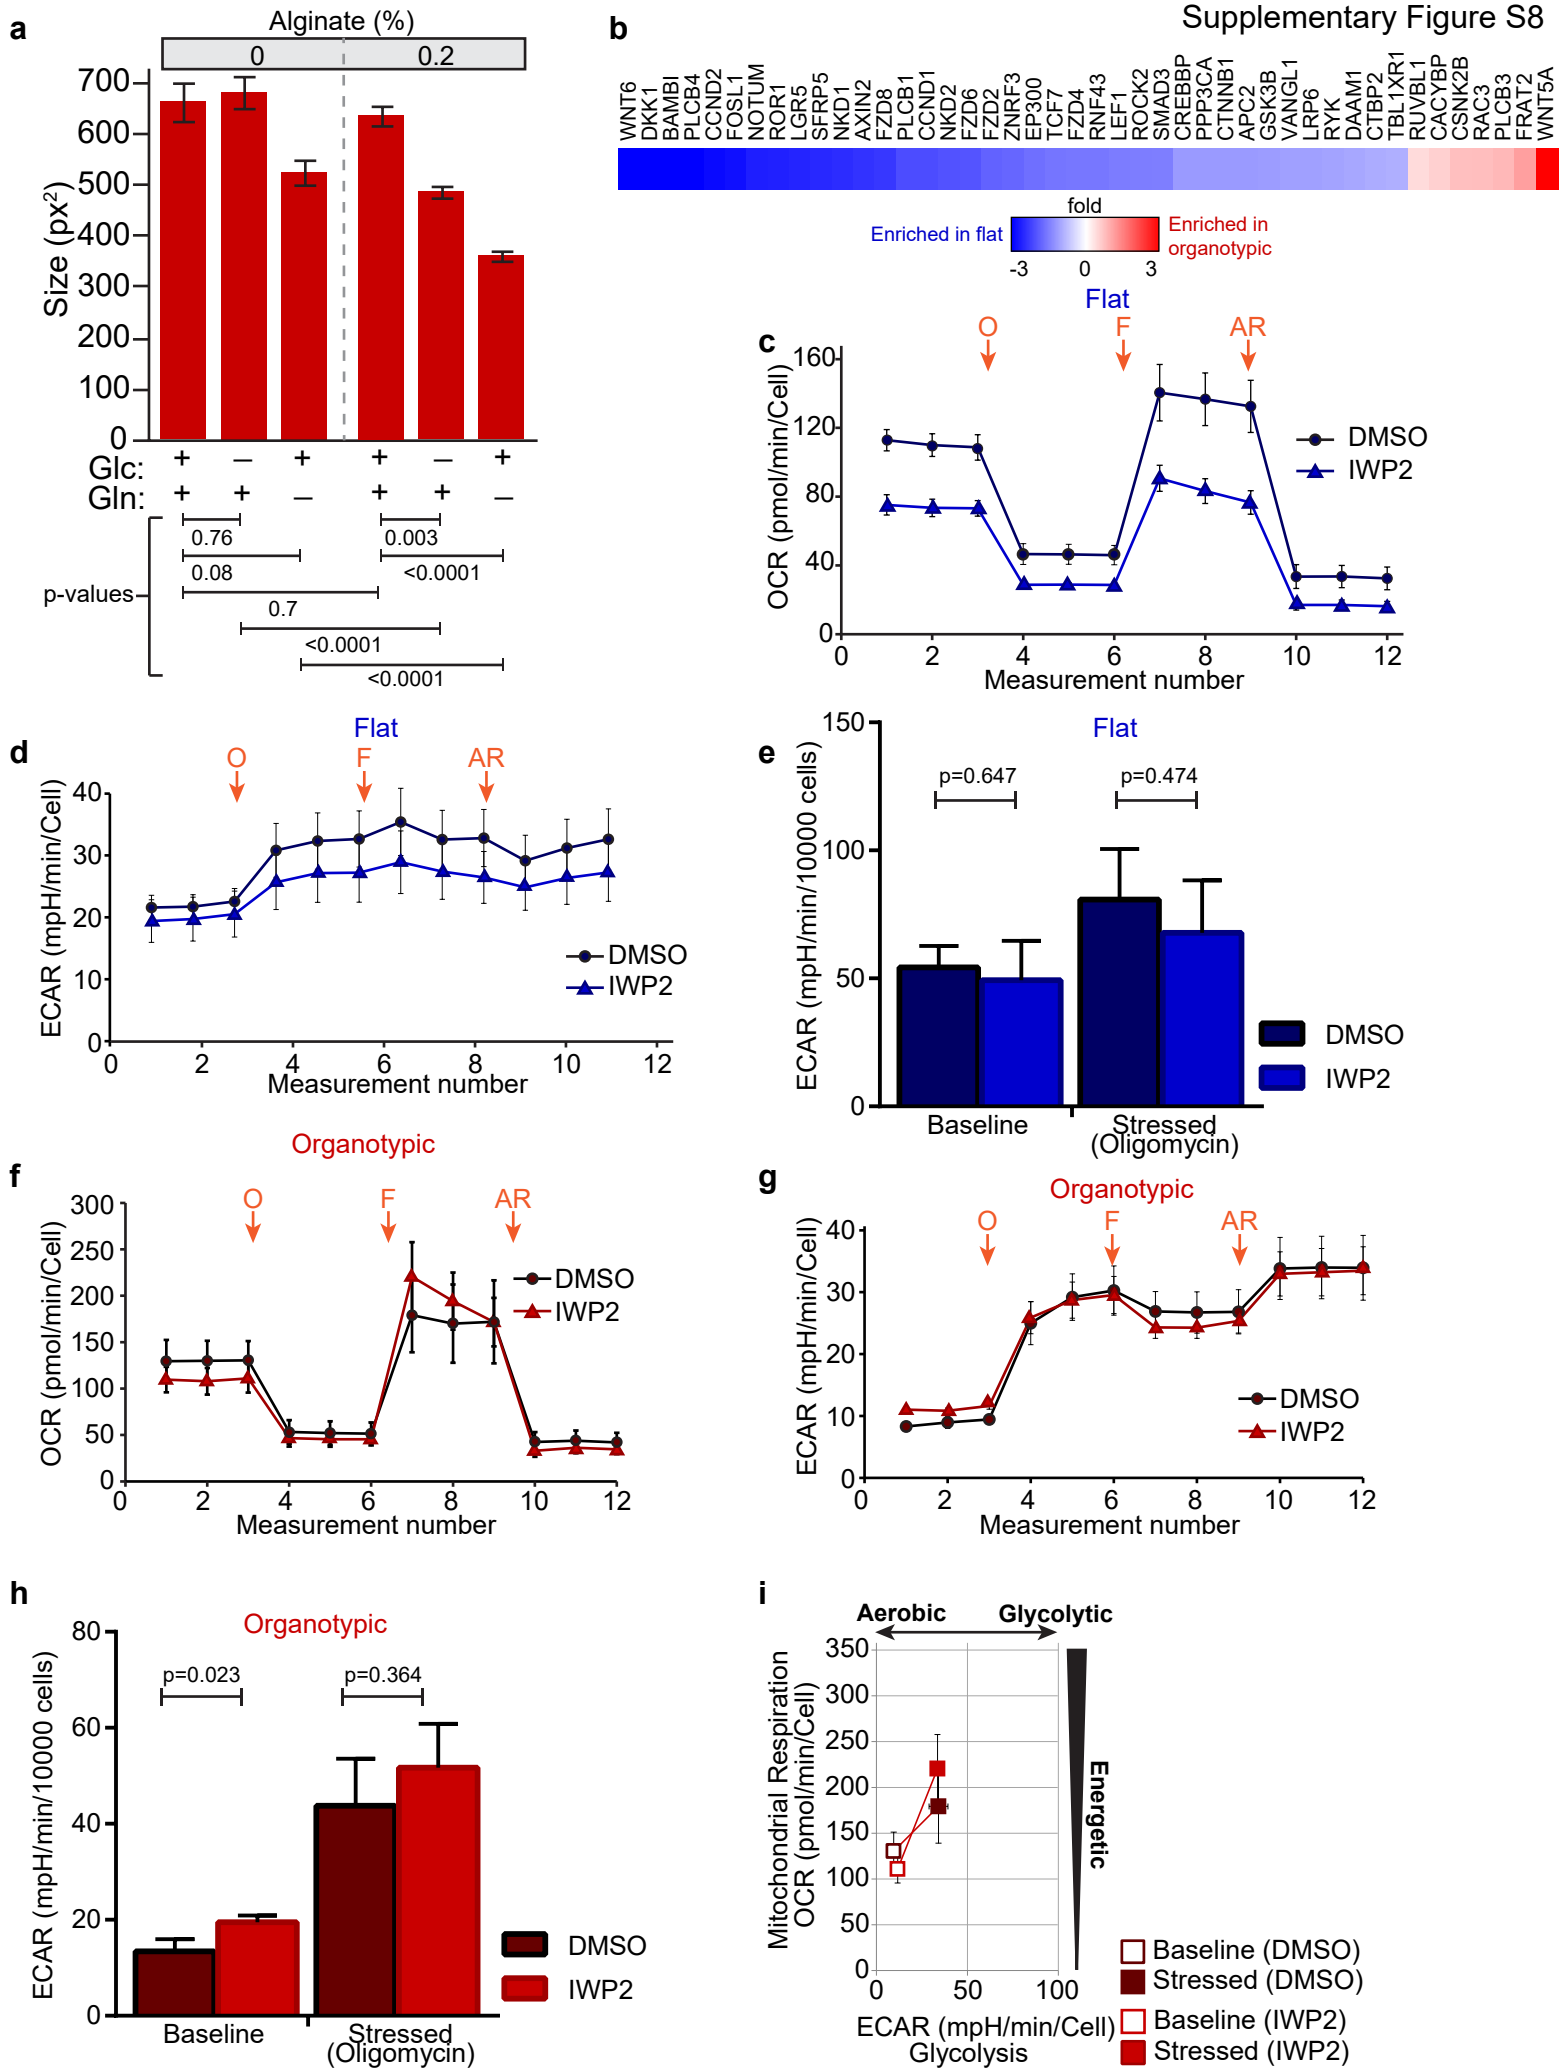

## **Supplementary Figure S8 – Mechanical regulation of metabolic plasticity correlates with Wnt signaling**

**a)** Bar chart showing the sizes of Caco-2 spheroids in organotypic cultures cells in complete (Glc/Gln+), glucose-depleted (Glc-), or glutamine-depleted (Gln-) medium. Cells were cultured embedded in 50% basement membrane extract (BME) in the presence of 0 or 2% alginate for 5 days. For 0% alginate: n=319 (Glc+/Gln+), n=254 (Glc-), and n=127 (Gln-) spheroids were measured; for 0.2% alginate: n=234 (Glc+/Gln+), n=254 (Glc-), and n=127 (Gln-) (r=2 independent replicates).

**b)** Heat map showing enrichment of canonical Wnt-associated genes in flat cultures based on differential gene expression data (Supplementary Table S1). Wnt-associated genes are annotated from the KEGG\_WNT\_SIGNALING\_PATHWAY gene set.

**c)** Representative line graph showing OCR measurements from control (DMSO) and IWP2-treated flat Caco-2 cultures in response to mitochondrial stressors (Oligomycin (O), FCCP (F), and Antimycin A with Rotenone (AR)).

**d)** Representative line graph showing ECAR measurements from control (DMSO) and IWP2-treated flat Caco-2 cultures in response to mitochondrial stressors (Oligomycin (O), FCCP (F), and Antimycin A with Rotenone (AR)).

**e)** Bar chart showing ECAR measurements from control (DMSO) and IWP2-treated flat Caco-2 cultures at baseline and following oligomycin-induced mitochondrial stress (r=3 independent experimental replicates).

**f)** Representative line graph showing OCR measurements from control (DMSO) and IWP2-treated organotypic Caco-2 cultures in response to mitochondrial stressors (Oligomycin (O), FCCP (F), and Antimycin A with Rotenone (AR)).

**g)** Representative line graph showing ECAR measurements from control (DMSO) and IWP2-treated organotypic Caco-2 cultures in response to mitochondrial stressors (Oligomycin (O), FCCP (F), and Antimycin A with Rotenone (AR)).

**h)** Bar chart showing ECAR measurements from control (DMSO) and IWP2-treated organotypic Caco-2 cultures at baseline and following oligomycin-induced mitochondrial stress (r=3 independent experimental replicates).

**i)** Plot showing the bioenergetic profile of control or IWP2-treated organotypic Caco-2 cultures at baseline activity (open symbols) and in response to mitochondrial oxidative phosphorylation uncoupler, FCCP (closed symbols) (r=3 independent experimental replicates).
