# Supplementary material for: Architectural control of metabolic plasticity in epithelial cancer cells
Source: PubMed Central journal article supplement (PMC7979883; doi:10.1038/s42003-021-01899-4), 2021-03-19
Supplement: 42003_2021_1899_MOESM3_ESM.pdf [file 42003_2021_1899_MOESM3_ESM.pdf]

## **Description of Additional Supplementary Files**

**File name:** Supplementary Data 1

**Description:** List of differentially expressed genes between Caco2 cells grown in flat/2D and organotypic/3D cultures.

**File name:** Supplementary Data 2

**Description:** List of metabolite GC/MS data as area under the curve (AUC) normalized to cell number.

**File name:** Supplementary Data 3

**Description:** The source data underlying the graphs and charts presented in the main figures
